# Supplementary material for: The Mechanism of Action of Ginkgolic Acid (15:1) against Gram-Positive Bacteria Involves Cross Talk with Iron Homeostasis
Source: PubMed Central journal article supplement (PMC8754111; doi:10.1128/spectrum.00991-21), 2022-01-12
Supplement: spectrum00991-21_supp_1_seq10.pdf [file spectrum00991-21_supp_1_seq10.pdf]

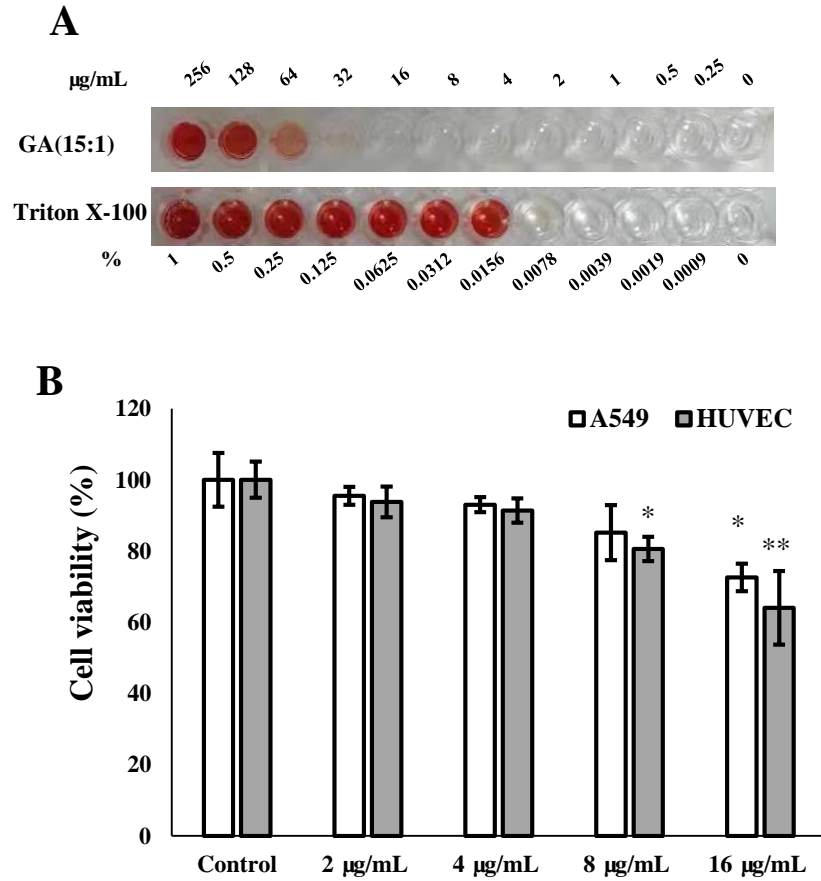

FIG S1 hemolytic activity assay for GA (15:1) against fresh human RBCs and Cytotoxic assay against A549 and HUVEC cell lines.

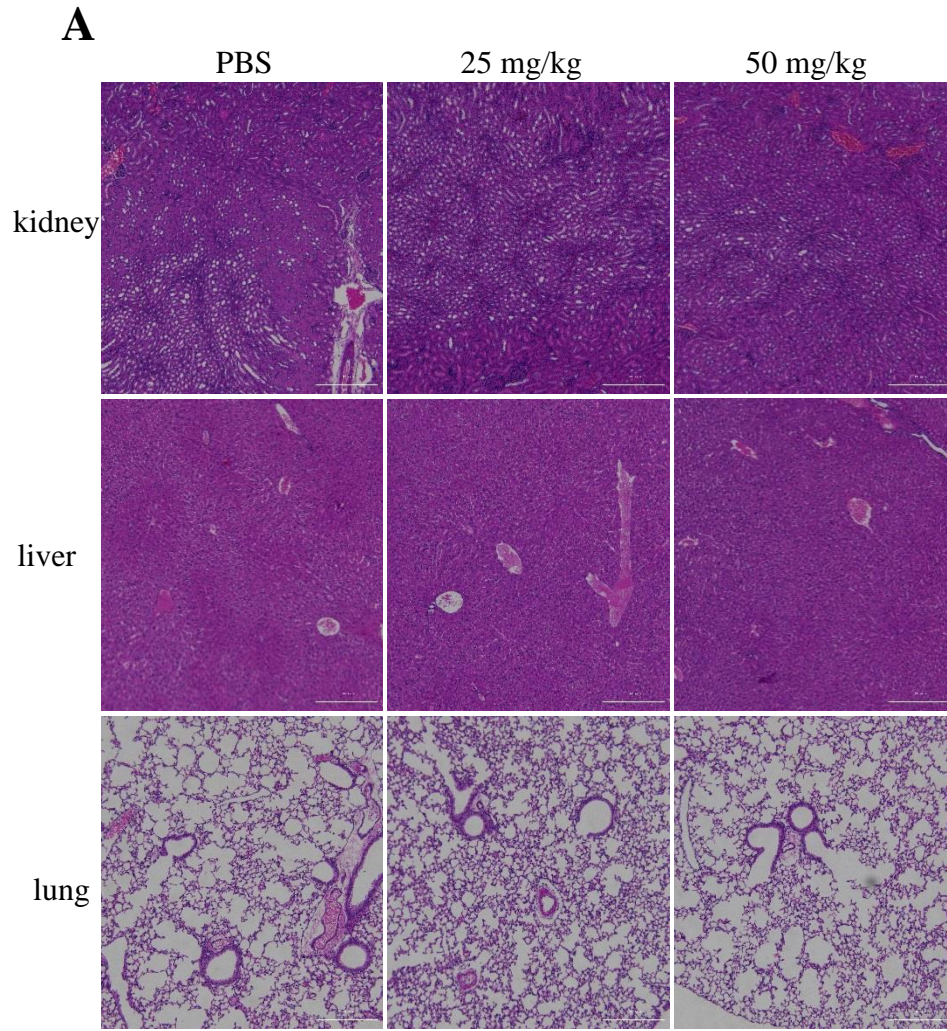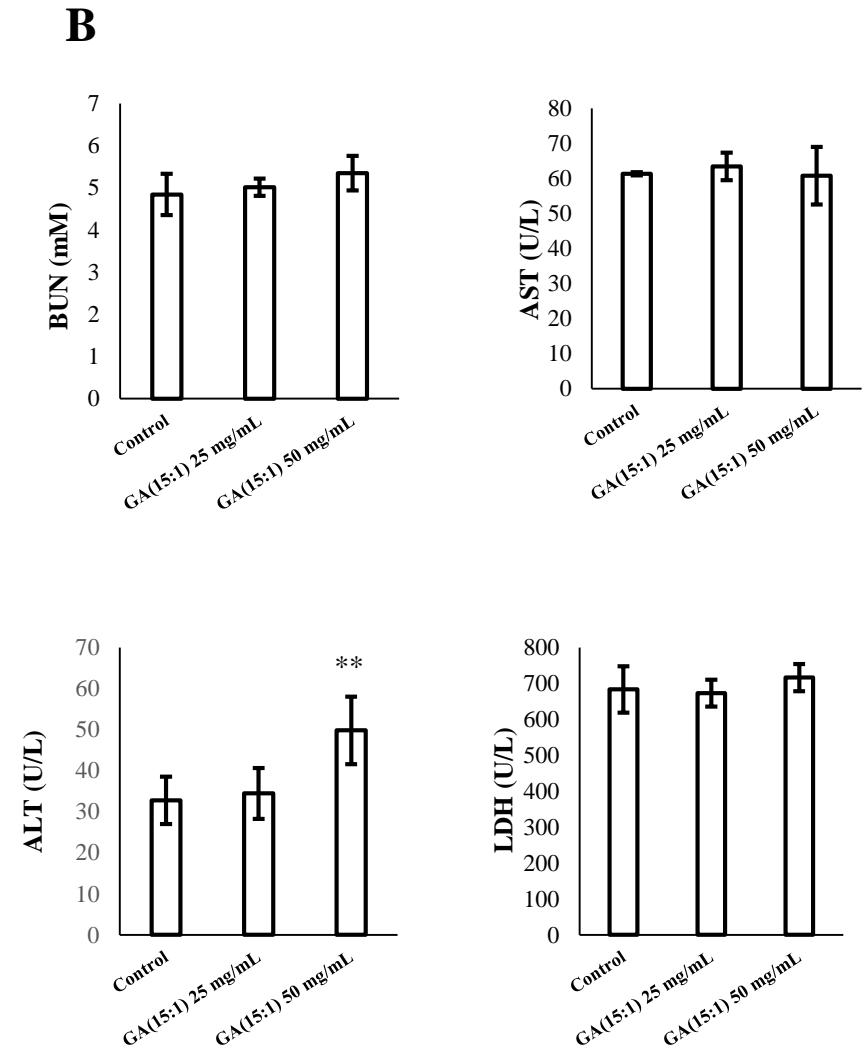

FIG S2 Histopathology of organs and blood parameters collected from mice treated with GA (15:1).

**Supplemental Tables S1-S3**

**Table S1.** Mutations in the GA (15:1)-induced non-sensitive isolates detected by the whole-genome sequencing

| <b>ref_gene_ID</b>       | <b>Nucleotide mutation</b> | <b>Amino acid mutation</b> | <b>description</b>                                                                                 |
|--------------------------|----------------------------|----------------------------|----------------------------------------------------------------------------------------------------|
| <b>16C51T1</b>           |                            |                            |                                                                                                    |
| 16C51T1_GM000842         | G213T                      | R71S                       | MarR family transcriptional regulator                                                              |
| <b>16C51T1_GM001013</b>  | <b>A400G</b>               | <b>R134G</b>               | <b>Fur family transcriptional regulator</b>                                                        |
| 16C51T1_GM001052         | T848G                      | D283A                      | ethanolamine ammonia-lyase light chain family protein                                              |
| 16C51T1_GM000634         | A826G                      | X276Q                      | Potassium efflux system KefA protein / Small-conductance mechanosensitive channel                  |
| 16C51T1_GM001288         | A449C                      | K150T                      | HTH-type dhaKLM operon transcriptional activator dhaS                                              |
| 16C51T1_GM001991         | C605T                      | S202F                      | sigma-54 factor interaction domain-containing protein                                              |
| 16C51T1_GM002261         | T457C                      | K153E                      | transcriptional regulator, IclR family                                                             |
| 16C51T1_GM002262         | T109C                      | K37E                       | MerR family transcriptional regulator                                                              |
| <b>16C51T1_GM002375</b>  | <b>A65C</b>                | <b>E22A</b>                | <b>YhgE/Pip C-terminal domain</b>                                                                  |
| 16C51T1_GM002628         | A169G                      | N57D                       | RNA-binding protein                                                                                |
| <b>16C166T1</b>          |                            |                            |                                                                                                    |
| 16C166T1_GM000207        | C41T                       | A14V                       | OmpR family two component system sensor histidine kinase VicK/Walk                                 |
| <b>16C166T1_GM000466</b> | <b>G61A</b>                | <b>A21T</b>                | <b>Fur family transcriptional regulator</b>                                                        |
| 16C166T1_GM000502        | C923T                      | R308Q                      | Acetaldehyde dehydrogenase, ethanolamine utilization cluster                                       |
| 16C166T1_GM000709        | G538A                      | V180I                      | Bifunctional (p)ppGpp synthase/hydrolase RelA                                                      |
| 16C166T1_GM000786        | G434A                      | R145H                      | Phage lysin, N-acetylmuramoyl-L-alanine amidase                                                    |
| 16C166T1_GM000862        | G352A                      | E118K                      | general stress protein                                                                             |
| 16C166T1_GM000864        | T59C                       | V20A                       | catabolite control protein A                                                                       |
| 16C166T1_GM000947        | G337A                      | A113T                      | Dihydrolipoamide acyltransferase component of branched-chain alpha-keto acid dehydrogenase complex |
| 16C166T1_GM001085        | G665A                      | R222Q                      | ABC transporter ATP-binding protein                                                                |
| 16C166T1_GM001139        | T731C                      | H244R                      | Phosphosugar-binding transcriptional regulator, RpiR family                                        |
| 16C166T1_GM001140        | T823G                      | S275A                      | 6-phosphogluconate dehydrogenase                                                                   |
| 16C166T1_GM001509        | G170A                      | R57Q                       | putative membrane spanning protein                                                                 |
| 16C166T1_GM001404        | A452G                      | D151G                      | Lsa family ABC-F type ribosomal protection protein                                                 |
| 16C166T1_GM001758        | C170T                      | R57Q                       | hypothetical protein                                                                               |
| 16C166T1_GM001815        | T1022C                     | Q341R                      | ABC transporter, ATP-binding protein                                                               |
| 16C166T1_GM001658        | A109G                      | S37P                       | aspartyl/glutamyl-tRNA amidotransferase subunit A                                                  |
| 16C166T1_GM002200        | A515T                      | N172I                      | uracil-DNA glycosylase                                                                             |
| <b>16C166T1_GM002110</b> | <b>A55G, A64G</b>          | <b>I19V, T22A</b>          | <b>YhgE/Pip C-terminal domain</b>                                                                  |
| 16C166T1_GM002316        | G265A                      | A89T                       | major facilitator superfamily transporter (MFS) transporter                                        |
| 16C166T1_GM002439        | C1501T                     | G501S                      | ABC transporter, ATP-binding protein                                                               |
| 16C166T1_GM002451        | C1649T                     | S550L                      | prolyl-tRNA synthetase                                                                             |
| 16C166T1_GM002533        | T110C                      | X37W                       | PTS system mannose/fructose/sorbose family IID component                                           |
| 16C166T1_GM002555        | A262G                      | N88D                       | Methylphosphotriester-DNA--protein-cysteine S-methyltransferase                                    |
| 16C166T1_GM002559        | G65A                       | T22I                       | conserved hypothetical protein                                                                     |

**Table S2.** Proteins that showed differential expression following treatment of *E. faecalis* OG1RF with 1/2×MIC GA (15:1).

| Accession                                | Uniprot ID | Gene name | Protein Name                               | Log2 fold change (GA (15:1)/control) |
|------------------------------------------|------------|-----------|--------------------------------------------|--------------------------------------|
| <b>Protein synthesis</b>                 |            |           |                                            |                                      |
| E2YYF3                                   | Q839E1     | rpmJ      | 50S ribosomal protein L36                  | 2.46                                 |
| E2Z0D8                                   | Q82ZJ1     | rpsO      | 30S ribosomal protein S15                  | 1.37                                 |
| E2YYG4                                   | Q839F2     | rplE      | 50S ribosomal protein L5                   | -5.81                                |
| E2YYG1                                   | Q839E9     | rplF      | 50S ribosomal protein L6                   | -3.03                                |
| E2YU54                                   | Q839Y6     | rplI      | 50S ribosomal protein L9                   | -2.75                                |
| E2YSK6                                   | Q830Q5     | rplK      | 50S ribosomal protein L11                  | -4.12                                |
| E2YYG6                                   | Q839F4     | rplN      | 50S ribosomal protein L14                  | -5.08                                |
| E2YSZ4                                   | Q833P5     | rplS      | 50S ribosomal protein L19                  | -2.05                                |
| E2YYH4                                   | Q839G2     | rplW      | 50S ribosomal protein L23                  | -4.55                                |
| E2YYG8                                   | Q839F6     | rpmC      | 50S ribosomal protein L29                  | -1.75                                |
| E2YYH0                                   | Q839F8     | rpsC      | 30S ribosomal protein S3                   | -1.61                                |
| E2YYH7                                   | Q839G5     | rpsJ      | 30S ribosomal protein S10                  | -1.51                                |
| E2YYF1                                   | Q839E0     | rpsK      | 30S ribosomal protein S11                  | -2.75                                |
| E2YUG8                                   | Q834A6     | yfiA      | Ribosome hibernation promoting factor      | -2.03                                |
| E2YSZ6                                   | Q833P4     | rimM      | Ribosome maturation factor RimM            | -1.04                                |
| E2YWP9                                   | Q835U7     | rbfA      | Ribosome-binding factor A                  | -2.42                                |
| E2YZW1                                   | Q831P1     | bipA      | 50S ribosomal subunit assembly factor BipA |                                      |
| E2YVU0                                   | Q831X4     | asnS      | Asparagine--tRNA ligase                    | -1.49                                |
| E2YT60                                   | Q833I1     | hisS      | Histidine--tRNA ligase                     | -2.18                                |
| E2YZH4                                   | Q837N5     | leuS      | Leucine--tRNA ligase                       | -1.03                                |
| E2YXL6                                   | P0DM33     | tyrS1     | Tyrosine--tRNA ligase 1                    | -1.46                                |
| E2YX98                                   | Q837T2     | trhO      | tRNA uridine(34) hydroxylase               | -1.01                                |
| E2YWF3                                   | Q839G8     | tuf       | Elongation factor Tu                       | -3                                   |
| E2YZP8                                   | Q831V0     | tsf       | Elongation factor Ts                       | -1.19                                |
| E2YZA4                                   | Q838Z5     | efp       | Elongation factor P                        | -2.16                                |
| E2Z0D9                                   | Q82ZJ0     | def       | Peptide deformylase                        | -1.72                                |
| E2YVH3                                   | Q834F5     | ffh       | Signal recognition particle protein        | -1.41                                |
| E2YVN7                                   | Q836I9     | rph       | RNase PH                                   | -1.55                                |
| E2Z014                                   | Q831F9     | glyA      | Serine hydroxymethyltransferase            | -1                                   |
| E2YVA5                                   | Q834Q6     | cysK      | Cysteine synthase                          | -1.74                                |
| <b>Cell division</b>                     |            |           |                                            |                                      |
| E2YY78                                   | H7C713     | divIVA    | Cell division protein DivIVA               | -2.06                                |
| E2YY72                                   | O07111     | ftsA      | Cell division protein FtsA                 | -3.36                                |
| <b>DNA replication and transcription</b> |            |           |                                            |                                      |
| E2YY54                                   | Q836W8     | nusB      | Transcription antitermination protein NusB | -1.15                                |
| E2YXV3                                   | Q837G4     | polA      | DNA polymerase I                           | -1.02                                |
| E2YVU7                                   | Q831Y0     | xpt       | Xanthine phosphoribosyltransferase         | -1.99                                |
| E2YY61                                   | Q836W1     | recN      | DNA repair protein RecN                    | -1.04                                |
| E2YU48                                   | Q839Z1     | gyrB      | DNA gyrase subunit B                       | -2                                   |
| E2YVD2                                   | H7C794     | parE      | DNA topoisomerase IV subunit B             | -1.32                                |
| E2YZS8                                   | Q831S1     | guaC      | GMP reductase                              | -1.01                                |
| E2Z013                                   | Q831G0     | upp       | Uracil phosphoribosyltransferase           | -1.16                                |
| <b>Cell wall</b>                         |            |           |                                            |                                      |
| E2YWV6                                   | Q835N8     | trxB      | Thioredoxin reductase                      | -1.23                                |
| E2YSM0                                   | Q830P3     | murB      | UDP-N-acetylenolpyruvoylglucosamine        | -1.19                                |

|                                               |        |        |                                                                                |       |
|-----------------------------------------------|--------|--------|--------------------------------------------------------------------------------|-------|
|                                               |        |        | reductase                                                                      |       |
| E2YW24                                        | Q832N2 | EF2191 | dTDP-4-dehydrorhamnose reductase                                               | -1.91 |
| <b>Fatty acid biosynthesis and metabolism</b> |        |        |                                                                                |       |
| E2YXN9                                        | Q830B4 | accD   | Acetyl-coenzyme A carboxylase transferase subunit beta                         | -2.19 |
| E2YXN1                                        | Q830B0 | acpP   | Acyl carrier protein                                                           | -1.46 |
| E2YVA2                                        | Q834J1 | bkdA   | 2-oxoisovalerate dehydrogenase subunit alpha                                   | -1.82 |
| E2YXN8                                        | Q830B3 | accC   | Biotin carboxylase                                                             | -1.55 |
| E2YWX1                                        | Q835M2 | aceF   | Dihydrolipoamide acetyltransferase component of pyruvate dehydrogenase complex | -1.21 |
| E2YZA7                                        | Q820V3 | fabZ1  | 3-hydroxyacyl-[acyl-carrier-protein] dehydratase FabZ                          | -1.98 |
| E2YZA9                                        | Q820V5 | fabI   | Enoyl-[acyl-carrier-protein] reductase [NADH] FabI                             | -2.54 |
| E2YXN3                                        | Q830B1 | fabD   | Malonyl CoA-acyl carrier protein transacylase                                  | -4.75 |
| <b>Energy metabolism and ATP biosynthesis</b> |        |        |                                                                                |       |
| E2YWW8                                        | Q835M5 | EF1352 | Magnesium-transporting ATPase, P-type 1                                        | -1.51 |
| E2YVA7                                        | P37061 | nox    | NADH oxidase                                                                   | -1.78 |
| E2YYY2                                        | P59687 | nagB   | Glucosamine-6-phosphate deaminase                                              | -1.2  |
| E2YS42                                        | Q831A4 | atpG   | ATP synthase gamma chain                                                       | -1.12 |
| E2YS43                                        | Q831A3 | atpA   | ATP synthase subunit alpha                                                     | -2.34 |
| E2YYF5                                        | Q839E3 | adk    | Adenylate kinase                                                               | -1.32 |
| E2YUG6                                        | Q834A7 | secA   | Protein translocase subunit SecA                                               | -1.08 |
| E2YT51                                        | Q833J0 | tpiA   | Triosephosphate isomerase                                                      | -1.19 |
| E2YS23                                        | Q831C2 | manA   | Mannose-6-phosphate isomerase                                                  | -1.12 |
| E2YYC1                                        | Q836R3 | pfkA   | ATP-dependent 6-phosphofructokinase                                            | -2.37 |
| <b>ABC transporter</b>                        |        |        |                                                                                |       |
| E2YWE2                                        | Q839H9 | EF0188 | Iron compound ABC transporter                                                  | 1.98  |
| E2YTN1                                        | Q82ZZ1 | EF2906 | ABC-type sugar transport system                                                | 1.92  |
| E2YXW8                                        | Q837E9 | EF0893 | Amino acid ABC transporter                                                     | 1.86  |
| E2YS70                                        | Q830X6 | EF2642 | Glycine betaine/L-proline ABC transporter                                      | 1.57  |
| E2Z0F4                                        | Q82ZH5 | EF3082 | Iron compound ABC transporter                                                  | 1.51  |
| E2YWW3                                        | Q835N2 | EF1345 | Sugar ABC transporter                                                          | -1.61 |
| E2YWJ8                                        | Q835Z7 | EF1221 | Spermidine/putrescine ABC transporter                                          | -1.77 |
| E2YXU1                                        | Q837H4 | EF0865 | Glycine betaine/carnitine/choline transporter                                  | -1.9  |
| E2YVZ3                                        | Q832K5 | EF2221 | ABC transporter                                                                | -2.59 |
| <b>Others</b>                                 |        |        |                                                                                |       |
| E2YXT4                                        | Q837I1 | pip    | Phage infection protein                                                        | 1.51  |
| E2YXJ0                                        | Q838B1 | EF0661 | Oligopeptidase F, putative                                                     | 1.12  |
| E2YU41                                        | Q82YV0 | rnpA   | Ribonuclease P protein component                                               | 1     |
| E2YSI9                                        | Q830S4 | EF2698 | Tellurite resistance protein, putative                                         | -1    |
| E2YVQ9                                        | Q836G7 | EF1145 | Uncharacterized protein                                                        | -1.06 |
| E2YT13                                        | Q833M6 | EF1918 | Uncharacterized protein                                                        | -1.09 |
| E2YY01                                        | Q837B7 | EF0926 | DNA-binding response regulator                                                 | -1.13 |
| E2YWD3                                        | Q839I8 | EF0177 | Basic membrane protein family                                                  | -1.14 |
| E2YVG1                                        | Q834K3 | hslV   | ATP-dependent protease subunit HslV                                            | -1.16 |
| E2YSS8                                        | Q82ZW5 | EF2932 | AhpC/TSA family protein                                                        | -1.19 |
| E2YS72                                        | Q830X4 | EF2644 | Diacylglycerol kinase catalytic domain protein                                 | -1.21 |
| E2YXA8                                        | Q837T8 | EF0742 | Uncharacterized protein                                                        | -1.22 |
| E2YXC1                                        | Q837V0 | EF0728 | Uncharacterized RNA methyltransferase EF_0728                                  | -1.22 |

|        |        |        |                                                       |       |
|--------|--------|--------|-------------------------------------------------------|-------|
| E2YWV6 | Q835N8 | trxB   | Thioredoxin reductase                                 | -1.23 |
| E2Z0X2 | Q82Z22 | EF3257 | Oxidoreductase, pyridine nucleotide-disulfide family  | -1.23 |
| E2YVQ6 | Q836H0 | EF1142 | Hydrolase, haloacid dehalogenase-like family          | -1.3  |
| E2YT63 | Q833H8 | relA   | (p)ppGpp synthase                                     | -1.32 |
| E2YS71 | Q830X5 | EF2643 | Uncharacterized protein                               | -1.44 |
| E2YW81 | Q93K67 | arcA   | Arginine deiminase                                    | -1.45 |
| E2YS97 | Q830V2 | cutC   | Copper homeostasis protein CutC                       | -1.56 |
| E2YUC9 | P36922 | EF1730 | Putative Cys-tRNA(Pro)/Cys-tRNA(Cys) deacylase EbsC   | -1.59 |
| E2YW03 | Q832L4 | EF2212 | Uncharacterized protein                               | -1.6  |
| E2YSM6 | H7C7A0 | ahpC   | Alkyl hydroperoxide reductase C                       | -1.75 |
| E2YV73 | Q834T0 | EF1553 | TPR domain protein                                    | -1.83 |
| E2YYI8 | Q839B7 | EF0259 | S4 RNA-binding domain protein                         | -1.91 |
| E2YZV6 | Q831P5 | EF2455 | CAP_assoc_N domain-containing protein                 | -1.95 |
| E2YVD3 | Q834M9 | EF1616 | CoA-binding domain protein                            | -1.95 |
| E2YZR4 | Q831T4 | EF2415 | Uncharacterized protein                               | -1.97 |
| E2YZD5 | Q837P0 | EF0794 | Uncharacterized protein                               | -2.1  |
| E2YWD0 | Q839J1 | deoC   | Deoxyribose-phosphate aldolase                        | -2.12 |
| E2YTN8 | Q82ZZ9 | EF2898 | Peptidyl-prolyl cis-trans isomerase                   | -2.23 |
| E2YV83 | H7C796 | EF1562 | Phospho-2-dehydro-3-deoxyheptonate aldolase, putative | -2.69 |
| E2YYZ5 | Q838J4 | EF0453 | OsmC/Ohr family protein                               | -2.86 |
| E2YV71 | Q834T3 | hup    | DNA-binding protein HU                                | -2.93 |
| E2YUE5 | Q834C4 | EF1744 | General stress protein, putative                      | -3.01 |
| E2YV84 | P0DH71 | aroB   | 3-dehydroquinate synthase                             | -3.1  |
| E2YUF4 | Q834B6 | EF1753 | DUF4097 domain-containing protein                     | -3.3  |
| E2YRR2 | Q836D5 | EF1180 | UPF0337 protein EF_1180                               | -3.42 |
| E2YXG8 | Q837Z3 | EF0681 | UPF0342 protein EF_0681                               | -3.55 |
| E2YTL1 | Q82ZX2 | EF2925 | Cold-shock domain family protein                      | -4.24 |

**Table S3.** Sequence of primers used in this study.

| <b>Primers</b>          | <b>Sequence (5' to 3')</b>      | <b>Purpose</b>      |
|-------------------------|---------------------------------|---------------------|
| <i>Fur-sense</i>        | AAGAAGCCAATATCCGAATTAC          |                     |
| <i>Fur-antisense</i>    | AACCGTTGCTACACTCAT              |                     |
| <i>gdh-sense</i>        | CGTGATGAACCGAATGTG              |                     |
| <i>gdh-antisense</i>    | GTTAATGCGTGTGCCTTT              |                     |
| <i>EF0188-sense</i>     | CACATGAAGTAACAGATACCTTAG        |                     |
| <i>EF0188-antisense</i> | CTTGAATGCTGCCTTGTC              |                     |
| <i>EF0191-sense</i>     | ATGGTCGTCAAGTGATTAGT            | <i>quantitative</i> |
| <i>EF0191-antisense</i> | AATGTTGAAGTTCTTGGTTCTT          | <i>RT-PCR</i>       |
| <i>EF045-sense</i>      | TGGACATGGGCTTAACAA              |                     |
| <i>EF045-antisense</i>  | CAAGATTAGTTCCGCTTCAC            |                     |
| <i>EF3082-sense</i>     | ATGGGCAAAGTGTTCCTTAC            |                     |
| <i>EF3082-antisense</i> | ACATCTGGTTGAAGCATAATG           |                     |
| <i>EF3085-sense</i>     | TTGCTGGTAGTACGATGAG             |                     |
| <i>EF3085-antisense</i> | AATTGCCGTTTCGATAGAGA            |                     |
| <i>Fur-F</i>            | GGATCCatggacaacgtattggtaaataatg | Generation of       |
| <i>Fur-R</i>            | CTCGAGttacacattctctgtgtgc       | pIB166- <i>Fur</i>  |
